# Supplementary material for: A low Pt-loaded electrode electrochemically synthesized from bulk metal for electrocatalytic applications
Source: Royal Society of Chemistry journal article supplement (doi:10.1039/d4ta02022g), 2024-01-01
Supplement: d4ta02022g1.pdf [file d4ta02022g1.pdf]

## Supporting Information

### Low Pt-loaded electrode electrochemical synthesized from bulk metal for electrocatalytic applications

Xiaofeng Lu<sup>a</sup>, Shizhao Wu<sup>a,\*</sup>, Shitao Zheng<sup>a</sup>, Xinying Sun<sup>a</sup>, Enjie Wang<sup>a</sup>, Youqun Chu<sup>a,b,c</sup>, Jing Gao<sup>a,b,c</sup>, Guohua Li<sup>a,b,c</sup>

<sup>a</sup>College of Chemical Engineering, Zhejiang University of Technology, Hangzhou 310014, People's Republic of China

<sup>b</sup>State Key Laboratory Breeding Base of Green Chemistry-Synthesis Technology

<sup>c</sup>Key Laboratory of Green Chemistry-Synthesis Technology of Zhejiang Province

\*Corresponding authors.

E-mail addresses: 50m@zjut.edu.cn (S. Wu)

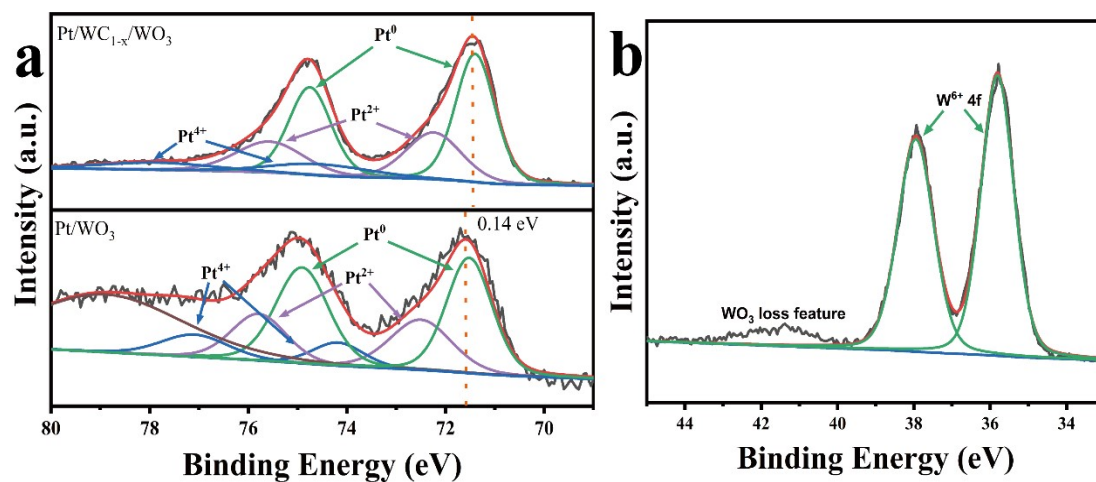

Fig. S1. XPS spectra : (a)Pt 4f for Pt/WC<sub>1-x</sub>/WO<sub>3</sub> and Pt/WO<sub>3</sub>, (b)W 4f for Pt/WO<sub>3</sub>.

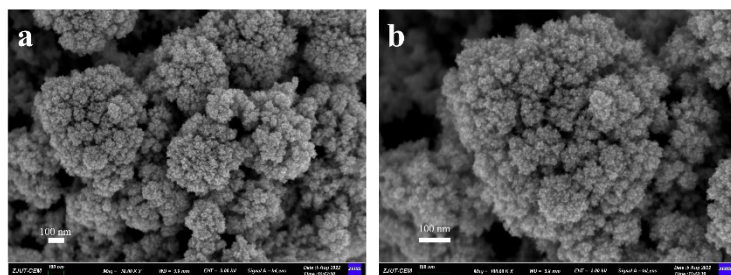

Fig. S2. (a-b) SEM images of the Pt/WO<sub>3</sub> nanocomposites.

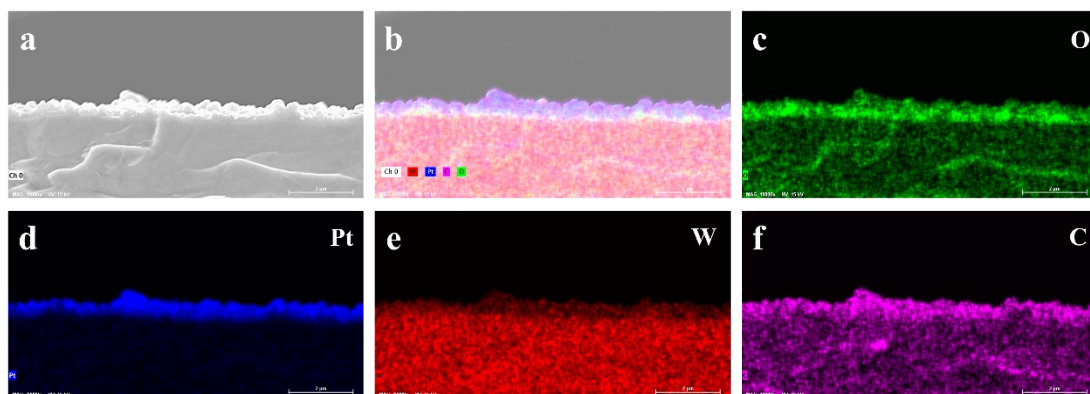

Fig. S3. (a-f) EDS element mapping images of Pt/WC<sub>1-x</sub>/WO<sub>3</sub>.

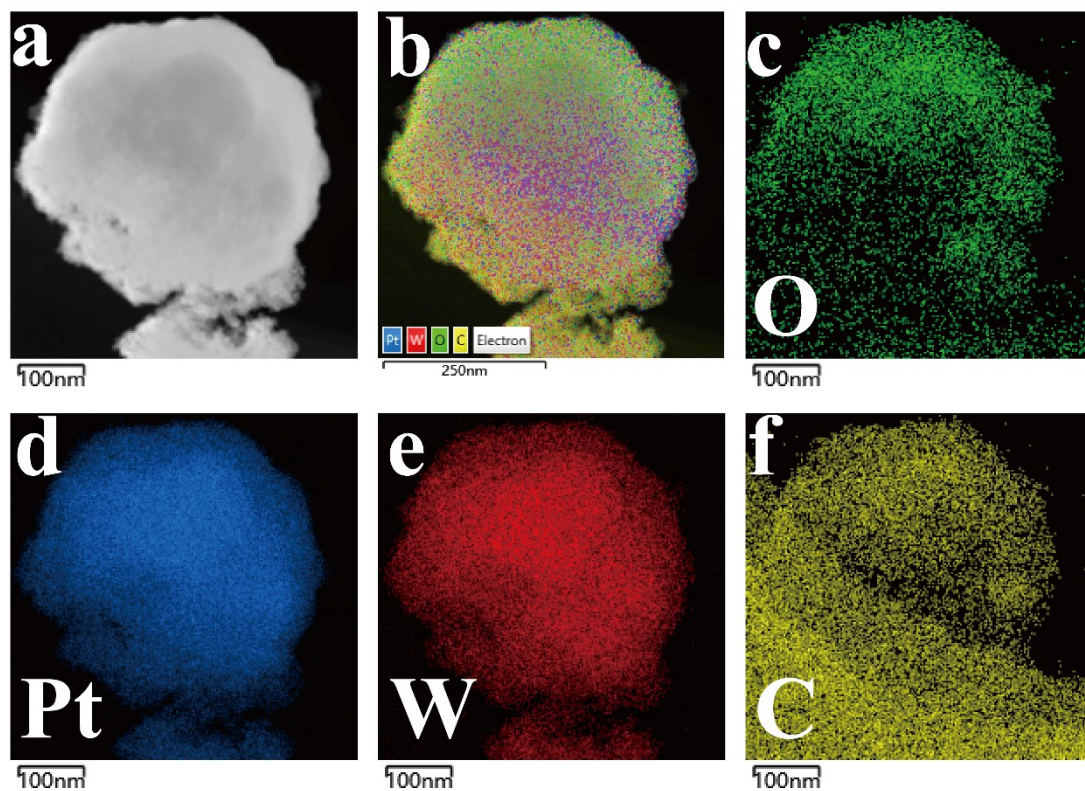

Fig. S4. (a-f) HAADF-STEM and corresponding elements mapping images of Pt/WC<sub>1-x</sub>/WO<sub>3</sub>.

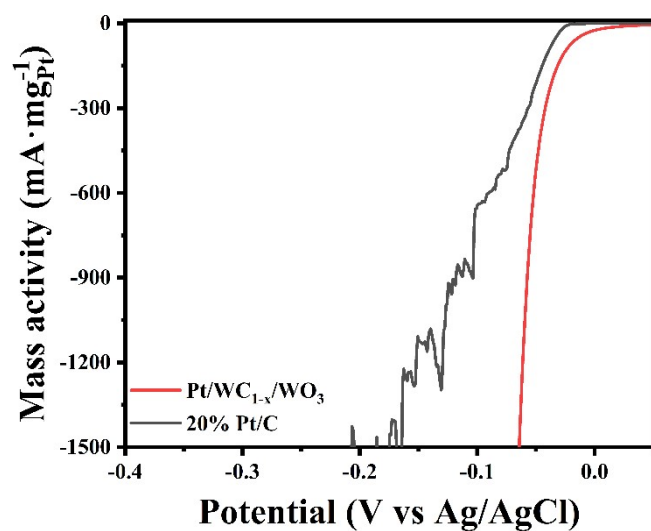

Fig. S5. Current densities normalized Pt mass at different potentials for Pt/WC<sub>1-x</sub>/WO<sub>3</sub> and Pt/C.

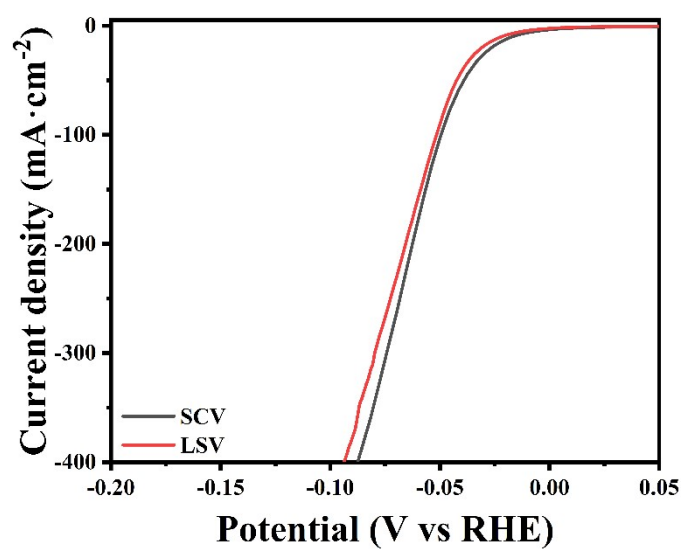

Fig. S6. SCV and LSV curves of Pt/WC<sub>1-x</sub>/WO<sub>3</sub>

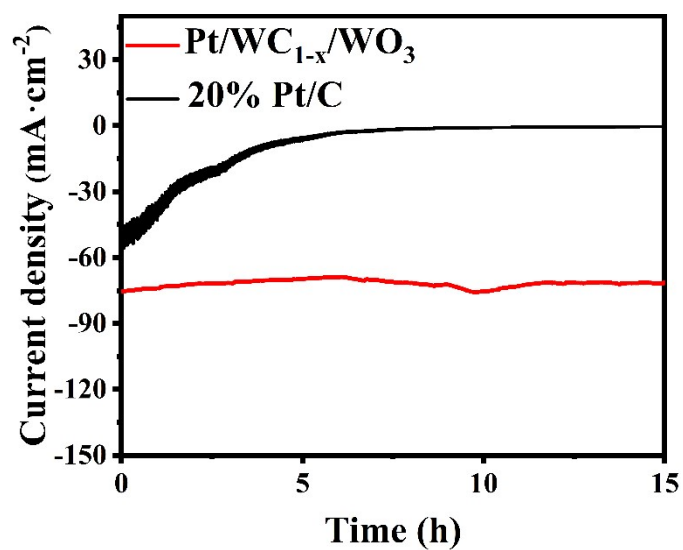

Fig. S7. Comparison of Pt/WC<sub>1-x</sub>/WO<sub>3</sub> and 20% Pt/C chronoamperometry curves (i-t).

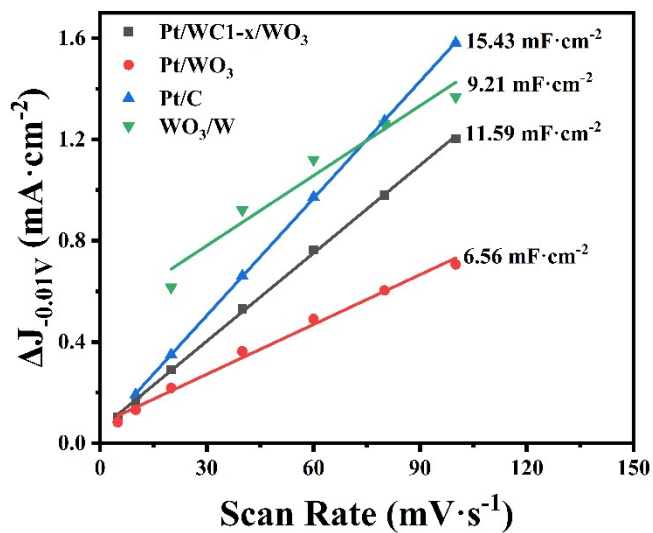

Fig. S8. Double-layer capacitances (C<sub>dl</sub>) for HER comparison of Pt/WC<sub>1-x</sub>/WO<sub>3</sub>, along with 20% Pt/C, and Pt/WO<sub>3</sub>.

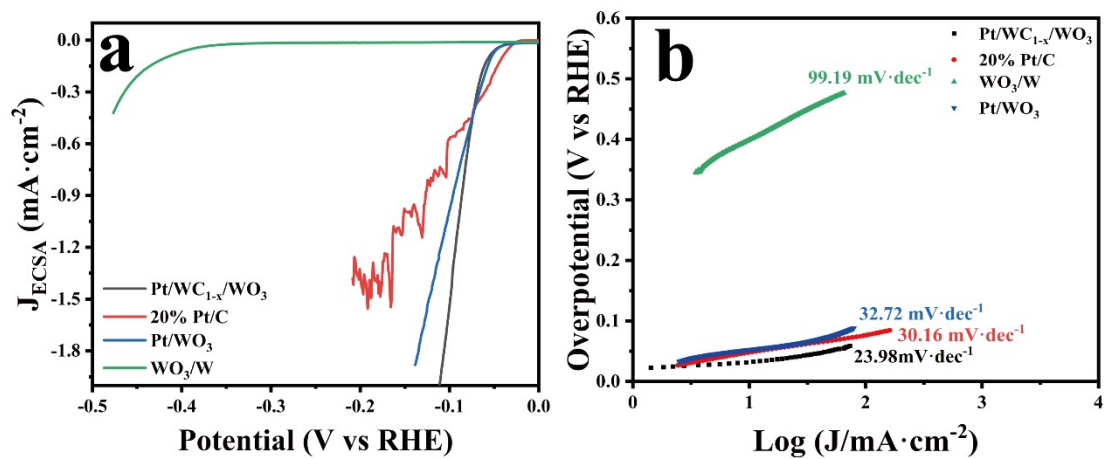

Fig. S9. (a) LSV curves normalized by ECSA; (b) Tafel plots of the LSV curves normalized by geometric area.

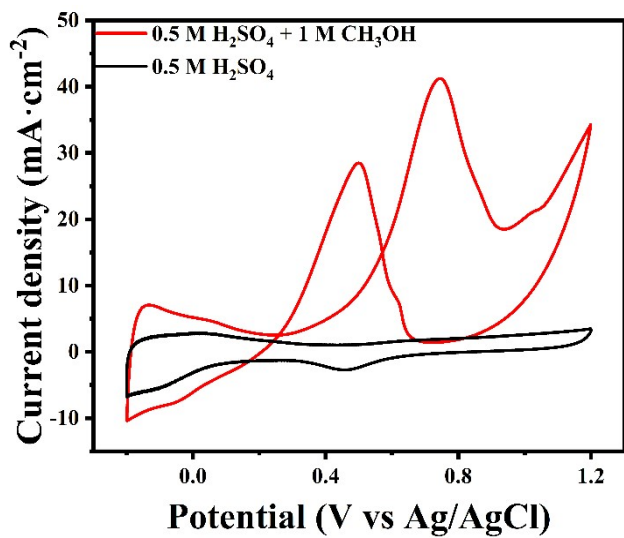

Fig. S10. CV curves of Pt/WC<sub>1-x</sub>/WO<sub>3</sub> in 0.5 M H<sub>2</sub>SO<sub>4</sub> + 1 M CH<sub>3</sub>OH and 0.5 M H<sub>2</sub>SO<sub>4</sub>.

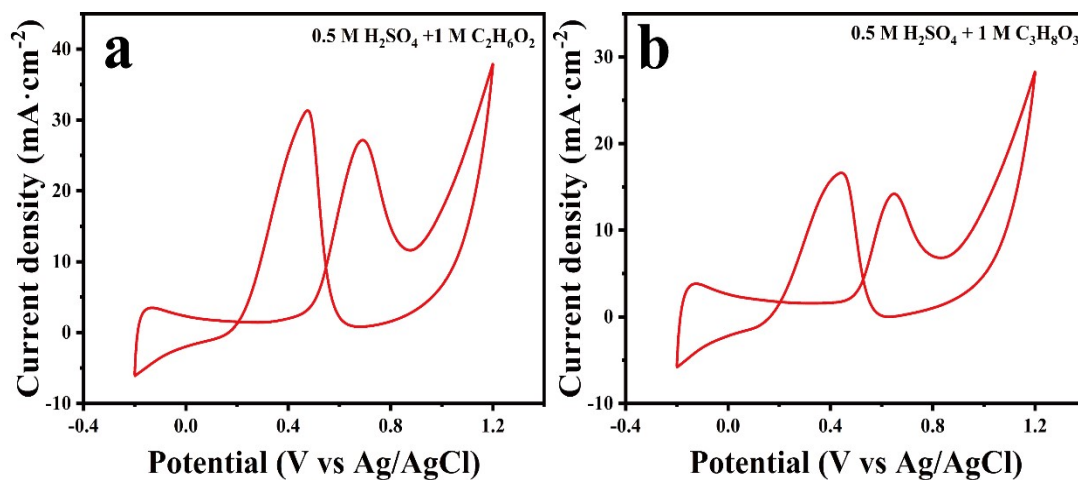

Fig. S11. (a) CV curves of Pt/WC<sub>1-x</sub>/WO<sub>3</sub> in 0.5 M H<sub>2</sub>SO<sub>4</sub> + 1 M C<sub>2</sub>H<sub>6</sub>O<sub>2</sub> normalized by the surface geometric area; (b) CV curves of Pt/WC<sub>1-x</sub>/WO<sub>3</sub> in 0.5 M H<sub>2</sub>SO<sub>4</sub> + 1 M C<sub>3</sub>H<sub>8</sub>O<sub>3</sub> normalized by the surface geometric area.

Table S1 ICP-OES of Pt/WC<sub>1-x</sub>/WO<sub>3</sub>.

(m<sub>0</sub>-Sample quality, V<sub>0</sub>- constant volume, C<sub>0</sub>- Test Solution Element Concentration, C<sub>1</sub>- Concentration of elements in digestion solution/original sample solution, C<sub>x</sub>- Sample Elemental Content)

|                                       | <b>m<sub>0</sub> (g)</b> | <b>V<sub>0</sub> (mL)</b> | <b>test element</b> | <b>C<sub>0</sub> (mg/L)</b> | <b>dilution factor</b> | <b>C<sub>1</sub> (mg/L)</b> | <b>C<sub>x</sub> (mg/kg)</b> | <b>W (%)</b> |
|---------------------------------------|--------------------------|---------------------------|---------------------|-----------------------------|------------------------|-----------------------------|------------------------------|--------------|
| Pt/WC <sub>1-x</sub> /WO <sub>3</sub> | 0.0571                   | 25                        | Pt                  | 1.40                        | 1                      | 1.40                        | 610.90                       | 0.06%        |

Table S2 Summary of recently reported catalysts for MOR in acidic electrolytes.

| <b>catalyst</b>                                                                 | <b>electrolyte</b>                                              | <b>Mass activity (A·mg<sup>-1</sup><br/>Pt)</b> | <b>Ref</b>                                        |
|---------------------------------------------------------------------------------|-----------------------------------------------------------------|-------------------------------------------------|---------------------------------------------------|
| <b>Pt/WC<sub>1-x</sub>/WO<sub>3</sub></b>                                       | 0.5 M H <sub>2</sub> SO <sub>4</sub> +1 M<br>CH <sub>3</sub> OH | 1.18                                            | This work                                         |
| <b>20% Pt/C</b>                                                                 | 0.5 M H <sub>2</sub> SO <sub>4</sub> +1 M<br>CH <sub>3</sub> OH | 0.48                                            | This work                                         |
| <b>Au@Ni@PtNiAu</b>                                                             | 0.5 M H <sub>2</sub> SO <sub>4</sub> +1 M<br>CH <sub>3</sub> OH | 0.35                                            | Nano Energy 2018,<br>52, 22-28                    |
| <b>Pt-Au NWs</b>                                                                | 0.1 M HClO <sub>4</sub> +1 M<br>CH <sub>3</sub> OH              | 1.04                                            | Nano Lett. 2023, 23,<br>7, 2758–2763              |
| <b>Pt-Ag DSNCs</b>                                                              | 0.5 M H <sub>2</sub> SO <sub>4</sub> +1 M<br>CH <sub>3</sub> OH | 0.567                                           | Appl. Catal. B<br>Environ. 2021,<br>282,119595    |
| <b>PtNi<sub>3</sub>-NGA</b>                                                     | 0.5 M H <sub>2</sub> SO <sub>4</sub> +1 M<br>CH <sub>3</sub> OH | 0.98                                            | Green Chem. 2023.<br>25. 3198                     |
| <b>CoFe@Pt-NCs</b>                                                              | 0.5 M H <sub>2</sub> SO <sub>4</sub> +1 M<br>CH <sub>3</sub> OH | 0.91                                            | J. Mater. Chem. A,<br>2022, 10, 13345             |
| <b>Pt<sub>1</sub>/Ti<sub>0.8</sub>W<sub>0.2</sub>N<sub>x</sub>O<sub>y</sub></b> | 0.5 M H <sub>2</sub> SO <sub>4</sub> +1 M<br>CH <sub>3</sub> OH | 0.56                                            | Electrochim. Acta<br>432 (2022) 141161            |
| <b>PtPdCo MHNPs</b>                                                             | 0.5 M H <sub>2</sub> SO <sub>4</sub> +1 M<br>CH <sub>3</sub> OH | 0.91                                            | Nanoscale 2019, 11,<br>4781-4787                  |
| <b>CuNi@PtCu OCs</b>                                                            | 0.1 M HClO <sub>4</sub> +1.0 M<br>CH <sub>3</sub> OH            | 1.01                                            | Angew. Chem. Int.<br>Ed. 2021, 133, 7753-<br>7758 |
| <b>AL-Pt/Pt<sub>3</sub>Ga</b>                                                   | 0.5 M H <sub>2</sub> SO <sub>4</sub> +1 M<br>CH <sub>3</sub> OH | 1.094                                           | J. Am. Chem. Soc.<br>2018, 140, 2773-<br>2776     |
| <b>PtBi/fcc-Pt NSs</b>                                                          | 0.1 M HClO <sub>4</sub> +0.1 M<br>CH <sub>3</sub> OH            | 1.1                                             | ACS Catal. 2018, 8,<br>5581-5590                  |
| <b>GDY@PtCu</b>                                                                 | 0.5 M H <sub>2</sub> SO <sub>4</sub> +1 M<br>CH <sub>3</sub> OH | 0.7                                             | Nano Today 39<br>(2021) 101213                    |
| <b>Pt-Pt<sub>5</sub>P<sub>2</sub> PNCs</b>                                      | 0.5 M H <sub>2</sub> SO <sub>4</sub> +1 M<br>CH <sub>3</sub> OH | 1.37                                            | Adv. Funct. Mater.<br>2022, 32, 2205985           |
| <b>PtCo/N-CNT-M</b>                                                             | 0.5 M H <sub>2</sub> SO <sub>4</sub> +1 M<br>CH <sub>3</sub> OH | 0.767                                           | Nanoscale, 2022,<br>14,14199–14211                |
